# Supplementary material
Source: HighWire-hosted journal article supplement (https://thorax.bmj.com/content/thoraxjnl-2016-209665)
Supplement: inline-supplementary-material-1 [file inline-supplementary-material-1.pdf]

1 **SUPPLEMENTARY MATERIAL**

2  
3  
4  
5  
6  
7  
8  
9  
10  
11  
12  
13  
14  
15  
16  
17  
18  
19  
20  
21  
22  
23  
24  
25  
26  
27  
28  
29  
30

Occupational exposure to pesticides are associated with fixed airflow obstruction in middle-age

**Authors**

Sheikh M. Alif<sup>1</sup>, Shyamali C. Dharmage<sup>1, 2</sup>, Geza Benke<sup>3</sup>, Martine Dennekamp<sup>3,4</sup>, John A. Burgess<sup>1</sup>, Jennifer L. Perret<sup>1, 5</sup>, Caroline J. Lodge<sup>1</sup>, Stephen Morrison<sup>6</sup>, David P. Johns<sup>7</sup>, Graham G. Giles<sup>1, 2, 8</sup>, Lyle C. Gurrin<sup>1, 2</sup>, Paul S. Thomas<sup>9</sup>, John L. Hopper<sup>1</sup>, Richard Wood-Baker<sup>7</sup>, Bruce R Thompson<sup>10</sup>, Iain H. Feather<sup>11, 12</sup>, Roel Vermeulen<sup>13</sup>, Hans Kromhout<sup>13</sup>, E Haydn Walters<sup>1, 3, 7</sup>, Michael J. Abramson<sup>3</sup>, Melanie C. Matheson<sup>1, 2</sup>

1 **SUPPLEMENTARY METHODS**

2 **Definitions of confounders**

3 Having had asthma was defined by an affirmative response to the question “Have you ever had  
4 asthma?” Current asthma was based on self-reported symptoms in the morning, day-time and  
5 night-time or flare-ups in the last 12 months. Childhood asthma was defined as asthma reported  
6 at age 7 and 12 by an affirmative response by the parents to the question “Has he/she at any  
7 time of his/her life suffered from attacks of asthma or wheezy breathing?” Smoking status of  
8 the participants was categorised as current, past and never-smokers. A current smoker was  
9 defined as smoking status within last four weeks. Pack-years were calculated as the number of  
10 cigarettes smoked per day divided by 20 multiplied by the number of years of smoking.(1)  
11 Childhood and adulthood socioeconomic status were defined using Australian census data of  
12 Socio-Economic Indexes for Areas (SEIFA indexes).(2) We used the Index of Education and  
13 Occupation (IEO) variables that focused on the skills of the people required in different  
14 occupations. A high IEO score indicated that individuals who lived in that area had high  
15 qualifications and highly skilled jobs.

16

17 **Additional statistical analysis**

18 We included 1,335 participants in the ever exposure analysis, but the participants with missing  
19 or incomplete job history (n=80) were excluded in cumulative EU-years analysis (N=1,255).  
20 Furthermore, we compared our complete-case analysis with multiple imputation by imputing  
21 the missing confounding variables (Supplementary Table S3, S4, and S5). The missing data  
22 ranged from 3% for pack-years to 0.3% for smoking, asthma, and socioeconomic status.  
23 Multiple imputation method in two-stages was used as a sensitivity analysis. In the first stage,  
24 the missing values were imputed by using chained equations (“mi impute chained” command)  
25 for 20 imputations in stata. In the second phase, the logistic regression analyses were performed  
26 in the imputed model including the same confounding variables that were included in the main  
27 complete-case analyses. We also tested Spearman rank correlation matrix between the  
28 exposures and the co-exposures were adjusted due to the presence of correlation.

29

30

31

32

1  
2  
3  
4  
5  
6  
7  
8  
9  
10  
11  
12  
13  
14  
15  
16  
17  
18  
19  
20  
21  
22  
23  
24  
25  
26  
27

**SUPPLEMENTARY RESULTS**

The prevalence of occupational exposures to biological dust, mineral dust, gases/fumes, VGDF, all pesticides, herbicides, and insecticides are presented in Supplementary Table S2. The most common exposure was the combined measure to VDGF with 75% of participants having exposure at some point in their working life. Exposure to gases/fumes was also high at 71%, followed by biological dust (55%), mineral dust exposure (52%), and the all pesticides (15.8%).

1 **Table S1:** Comparisons of characteristics between responders and non-responders at  
 2 of 2002-2008 follow-up study

| Study characteristics                             | Laboratory attendees      | Laboratory non-attendees      | p-value* | Completed Postal survey only | p-value** |
|---------------------------------------------------|---------------------------|-------------------------------|----------|------------------------------|-----------|
| <b>Sample size</b>                                | <b>N=1,397</b>            | <b>N=990</b>                  |          | <b>N=3,350</b>               |           |
| <b>Age, years (mean, SD)</b>                      | 44.8 (0.8)                | 45.7 (0.9)                    | 0.001    | 43.8 (0.1)                   | 0.003     |
| <b>Sex, %</b>                                     |                           |                               | 0.03     |                              | 0.92      |
| Men                                               | 684 (51.6)                | 509 (54.3)                    |          | 1,574 (50.6)                 |           |
| Women                                             | 651 (48.3)                | 417 (45.6)                    |          | 1,558 (49.3)                 |           |
| <b>Smoking history</b>                            |                           |                               |          |                              |           |
| <b>Never, n (%)</b>                               | 586 (44.6)                | 323 (36.8)                    |          | 1,366 (41.0)                 |           |
| <b>Past, n (%)</b><br>Pack-years, median [IQR]    | 413 (29.6)<br>7.5[2-17.4] | 259 (27.3)<br>11[2.3-22.5]    | 0.000    | 1,037 (30.9)<br>8 [2-18.8]   | 0.71      |
| <b>Current, n (%)</b><br>Pack-years, median [IQR] | 392 (25.7)<br>21[9.5-30]  | 395 (35.8)<br>23.3[13.5-33.7] |          | 933 (28.0)<br>19.5[10-29.4]  |           |
| <b>Currently employed, n (%)</b>                  | 1,182 (87.0)              | 802 (84.4)                    | 0.16     | 2,868 (85.9)                 | 0.28      |
| Chronic bronchitis                                | 256 (12.4)                | 204 (14.8)                    | 0.03     | 35 (4.8)                     | 0.000     |
| Chronic cough                                     | 191 (8.7)                 | 176 (11.2)                    | 0.004    | 131 (3.2)                    | 0.000     |
| Chronic phlegm                                    | 174 (6.6)                 | 139 (7.9)                     | 0.000    | 84 (1.9)                     | 0.000     |
| Dyspnoea                                          | 242 (12.2)                | 207 (14.6)                    | 0.01     | 283 (7.2)                    | 0.000     |
| Asthma                                            | 929 (39.8)                | 686 (44.2)                    | 0.000    | 710 (11.7)                   | 0.000     |
| Child asthma                                      | 401 (15.2)                | 282 (15.3)                    | 0.000    | 112 (1.3)                    | 0.000     |

4 *Definitions of abbreviations:* SD, Standard Deviation; IQR, Interquartile Range;

5 †The estimate prevalences were calculated using inverse-probability-of-inclusion  
 6 weights to adjust for the enriched sample of the fifth decade follow-up survey

7 \*compare lab attendees to non-attendees

8 \*\* compared postal survey participants to lab attendees

9

10

11

12

13

14

1 **Table S2:** Adjusted prevalence of occupational exposures in the study population  
 2 (n=1,335)

| <b>Study characteristics</b>             | <b>Biological dust<br/>n(%)</b> | <b>Mineral dust<br/>n(%)</b> | <b>Gases/<br/>fumes<br/>n(%)</b> | <b>VGDF<br/>n(%)</b> | <b>All pesticides<br/>n(%)</b> | <b>Herbicides<br/>n(%)</b> | <b>Insecticides<br/>n(%)</b> |
|------------------------------------------|---------------------------------|------------------------------|----------------------------------|----------------------|--------------------------------|----------------------------|------------------------------|
| No exposure                              | 579<br>(44.9)                   | 628 (47.7)                   | 375 (28.8)                       | 322 (24.9)           | 1,109<br>(84.2)                | 1,148<br>(86.9)            | 1,151<br>(87.6)              |
| Ever (low/high) exposure                 | 756<br>(55.0)                   | 707 (52.2)                   | 960 (71.2)                       | 1,013<br>(75.1)      | 226<br>(15.8)                  | 187<br>(13.0)              | 184<br>(12.3)                |
| Median [IQR] cumulative duration (years) | 16.5<br>(6-30)                  | 22<br>(8-48)                 | 21.5<br>(9-38.5)                 | 28<br>(12-76)        | 14.5<br>(4-28)                 | 12<br>(6-27)               | 17.8<br>(8-34.5)             |

3  
4  
5  
6  
7  
8  
9  
10  
11  
12  
13  
14  
15  
16  
17  
18  
19  
20  
21  
22

1 **Table S3:** Associations between ever exposures and cumulative EU-years and fixed AO -  
 2 LLN using complete case analysis and multiple imputation

| Exposures              | Fixed AO-LLN                |                         |
|------------------------|-----------------------------|-------------------------|
|                        | Complete case<br>RR (95%CI) | Imputed<br>RR (95%CI)   |
| <b>Biological dust</b> |                             |                         |
| Not exposed            | Ref.                        | Ref.                    |
| Exposed                | <b>1.56 (1.00-2.45)</b>     | <b>1.56 (1.00-2.45)</b> |
| Cumulative EU-years    | 1.03 (0.96-1.12)            | 1.05 (0.97-1.13)        |
| <b>Mineral dust</b>    |                             |                         |
| Not exposed            | Ref.                        | Ref.                    |
| Exposed                | 1.29(0.81-2.04)             | 1.29 (0.81-2.04)        |
| Cumulative EU-years    | 1.03 (0.97-1.11)            | 1.05 (0.97-1.11)        |
| <b>Gases/fumes</b>     |                             |                         |
| Not exposed            | Ref.                        | Ref.                    |
| Exposed                | 1.47 (0.87-2.51)            | 1.48 (0.87-2.53)        |
| Cumulative EU-years    | 1.02 (0.96-1.09)            | 1.02 (0.95-1.08)        |
| <b>VGDF</b>            |                             |                         |
| Not exposed            | Ref.                        | Ref.                    |
| Exposed                | 1.25 (0.72-2.15)            | 1.26 (0.73-2.17)        |
| Cumulative EU-years    | 1.03 (0.97-1.08)            | 1.02 (0.97-1.08)        |
| <b>All pesticides</b>  |                             |                         |
| Not exposed            | Ref.                        | Ref.                    |
| Exposed                | 1.63 (0.91-3.07)            | 1.61 (0.91-2.87)        |
| Cumulative EU-years    | <b>1.13 (1.00-1.29)</b>     | 1.12 (0.99-1.24)        |
| <b>Herbicides</b>      |                             |                         |
| Not exposed            | Ref.                        | Ref.                    |
| Exposed                | <b>1.95 (1.08-3.49)</b>     | <b>1.92 (1.08-3.44)</b> |
| Cumulative EU-years    | <b>1.15 (1.00-1.36)</b>     | 1.13 (0.98-1.31)        |
| <b>Insecticides</b>    |                             |                         |
| Not exposed            | Ref.                        | Ref.                    |
| Exposed                | 1.56 (0.84-2.90)            | 1.53 (0.83-2.84)        |
| Cumulative EU-years    | 1.10 (0.96-1.26)            | 1.10 (0.97-1.24)        |

3 † Complete case-analysis; ± Multiple imputation

4 *Definitions of abbreviations:* LLN, Lower Limit of Normal; AO, Airflow Obstruction; RR, Relative Risk; CI,  
 5 Confidence Interval; VGDF, Vapour, Gases, Dust and Fumes.

6 †Adjusted for sex, smoking, pack-years, childhood and adulthood socioeconomic status, childhood and  
 7 adulthood asthma and sampling weights. The analyses with biological dust, mineral dust, gases/fumes, and  
 8 VGDF were additionally adjusted for all pesticides, whereas the analyses with all pesticides, herbicides, and  
 9 insecticides were additionally adjusted for VGDF exposure.

10 The bolded text identifies results reaching statistical significance (p≤0.05)

**Table S4:** Association between Ever Exposure and Fixed Airflow Obstruction, Chronic Bronchitis and Respiratory Symptoms using complete case analysis and multiple imputation

| Exposures              | Fixed AO-GOLD            |                         | Chronic bronchitis       |                    | Chronic cough            |                         | Chronic phlegm           |                         | Dyspnoea                 |                         |
|------------------------|--------------------------|-------------------------|--------------------------|--------------------|--------------------------|-------------------------|--------------------------|-------------------------|--------------------------|-------------------------|
|                        | Complete case RR (95%CI) | Imputed RR (95%CI)      | Complete case RR (95%CI) | Imputed RR (95%CI) | Complete case RR (95%CI) | Imputed RR (95%CI)      | Complete case RR (95%CI) | Imputed RR (95%CI)      | Complete case RR (95%CI) | Imputed RR (95%CI)      |
| <b>Biological dust</b> |                          |                         |                          |                    |                          |                         |                          |                         |                          |                         |
| Not exposed            | Ref.                     | Ref.                    | Ref.                     | Ref.               | Ref.                     | Ref.                    | Ref.                     | Ref.                    | Ref.                     | Ref.                    |
| Exposed                | <b>1.58 (1.01-2.48)</b>  | <b>1.57 (1.00-2.48)</b> | 0.99 (0.67-1.48)         | 0.92 (0.61-1.38)   | 1.24 (0.83-1.84)         | 1.24 (0.83-1.85)        | 0.98 (0.66-1.46)         | 0.99 (0.66-1.47)        | 1.32 (0.95-1.85)         | 1.32 (0.94-1.86)        |
| <b>Mineral dust</b>    |                          |                         |                          |                    |                          |                         |                          |                         |                          |                         |
| Not exposed            | Ref.                     | Ref.                    | Ref.                     | Ref.               | Ref.                     | Ref.                    | Ref.                     | Ref.                    | Ref.                     | Ref.                    |
| Exposed                | 1.29 (0.81-2.04)         | 1.30 (0.82-2.06)        | 1.10 (0.72-1.67)         | 1.06 (0.68-1.64)   | <b>1.62 (1.06-2.48)</b>  | <b>1.66 (1.09-2.51)</b> | <b>1.51 (1.00-2.30)</b>  | <b>1.58 (1.03-2.40)</b> | <b>1.57 (1.10-2.23)</b>  | <b>1.55 (1.08-2.21)</b> |
| <b>Gases/fumes</b>     |                          |                         |                          |                    |                          |                         |                          |                         |                          |                         |
| Not exposed            | Ref.                     | Ref.                    | Ref.                     | Ref.               | Ref.                     | Ref.                    | Ref.                     | Ref.                    | Ref.                     | Ref.                    |
| Exposed                | 1.50 (0.88-2.54)         | 1.49 (0.88-2.55)        | 0.91 (0.58-1.45)         | 0.88 (0.55-1.40)   | 1.25 (0.80-1.98)         | 1.27 (0.81-2.01)        | 1.20 (0.76-1.90)         | 1.23 (0.78-1.95)        | 1.31 (0.89-1.91)         | 1.31 (0.90-1.92)        |
| <b>VGDF</b>            |                          |                         |                          |                    |                          |                         |                          |                         |                          |                         |
| Not exposed            | Ref.                     | Ref.                    | Ref.                     | Ref.               | Ref.                     | Ref.                    | Ref.                     | Ref.                    | Ref.                     | Ref.                    |
| Exposed                | 1.29 (0.73-2.17)         | 1.27 (0.74-2.19)        | 0.95 (0.58-1.55)         | 0.91 (0.55-1.50)   | <b>1.69 (1.01-2.84)</b>  | <b>1.72 (1.03-2.87)</b> | 1.31 (0.80-2.17)         | 1.34 (0.82-2.22)        | 1.29 (0.86-1.93)         | 1.29 (0.86-1.92)        |
| <b>All pesticides</b>  |                          |                         |                          |                    |                          |                         |                          |                         |                          |                         |
| Not exposed            | Ref.                     | Ref.                    | Ref.                     | Ref.               | Ref.                     | Ref.                    | Ref.                     | Ref.                    | Ref.                     | Ref.                    |
| Exposed                | <b>1.74 (1.00-3.07)</b>  | 1.72 (0.99-3.04)        | <b>1.81 (1.12-2.93)</b>  | 1.76 (0.99-3.14)   | <b>1.77 (1.04-3.01)</b>  | <b>1.86 (1.09-3.13)</b> | <b>2.06 (1.23-3.47)</b>  | <b>2.18 (1.30-3.66)</b> | <b>1.95 (1.23-3.09)</b>  | <b>2.01 (1.27-3.18)</b> |
| <b>Herbicides</b>      |                          |                         |                          |                    |                          |                         |                          |                         |                          |                         |
| Not exposed            | Ref.                     | Ref.                    | Ref.                     | Ref.               | Ref.                     | Ref.                    | Ref.                     | Ref.                    | Ref.                     | Ref.                    |
| Exposed                | <b>2.09 (1.18-3.70)</b>  | <b>2.06 (1.16-3.64)</b> | <b>1.81 (1.08-3.02)</b>  | 1.71 (0.96-3.05)   | <b>1.79 (1.04-3.09)</b>  | <b>1.89 (1.10-3.25)</b> | 1.62 (0.93-2.83)         | <b>1.74 (1.01-3.03)</b> | 1.44 (0.89-2.34)         | 1.49 (0.92-2.42)        |
| <b>Insecticides</b>    |                          |                         |                          |                    |                          |                         |                          |                         |                          |                         |
| Not exposed            | Ref.                     | Ref.                    | Ref.                     | Ref.               | Ref.                     | Ref.                    | Ref.                     | Ref.                    | Ref.                     | Ref.                    |
| Exposed                | 1.70 (0.93-3.10)         | 1.66 (0.91-3.03)        | <b>1.64 (1.00-2.72)</b>  | 1.51 (0.83-2.76)   | <b>1.74 (1.00-3.05)</b>  | <b>1.84 (1.05-3.18)</b> | 1.62 (0.93-2.84)         | <b>1.73 (1.00-3.00)</b> | 1.58 (0.97-2.57)         | <b>1.64 (1.01-2.68)</b> |

*Definitions of abbreviations:* GOLD, Global Obstructive Lung Disease; AO, Airflow Obstruction; RR, Relative Risk; CI, Confidence Interval; VGDF, Vapour, Gases, Dust and Fumes

† Adjusted for sex, smoking, pack-years, childhood and adulthood socioeconomic status, childhood and adulthood asthma and sampling weights. The analyses with biological dust, mineral dust, gases/fumes, and VGDF were additionally adjusted for all pesticides, whereas the analyses with all pesticides, herbicides, and insecticides were additionally adjusted for VGDF exposure.

The bolded text identifies results reaching statistical significance ( $p \leq 0.05$ )

**Table S5:** Association between Cumulative EU-years and Fixed Airflow Obstruction, Chronic Bronchitis and Respiratory Symptoms using complete-case analysis and multiple imputation

| Cumulative exposures*  | Fixed AO-GOLD            |                         | Chronic bronchitis       |                    | Chronic cough            |                         | Chronic phlegm           |                    | Dyspnoea                 |                         |
|------------------------|--------------------------|-------------------------|--------------------------|--------------------|--------------------------|-------------------------|--------------------------|--------------------|--------------------------|-------------------------|
|                        | Complete case RR (95%CI) | Imputed RR (95%CI)      | Complete case RR (95%CI) | Imputed RR (95%CI) | Complete case RR (95%CI) | Imputed RR (95%CI)      | Complete case RR (95%CI) | Imputed RR (95%CI) | Complete case RR (95%CI) | Imputed RR (95%CI)      |
| <b>Biological dust</b> | 1.05 (0.97-1.13)         | 1.05 (0.97-1.13)        | 1.06 (0.99-1.13)         | 1.00 (0.92-1.07)   | <b>1.07 (1.00-1.15)</b>  | 1.05 (0.99-1.13)        | 1.01 (0.94-1.09)         | 0.98 (0.91-1.06)   | 0.99 (0.92-1.06)         | 0.99 (0.93-1.06)        |
| <b>Mineral dust</b>    | 1.03 (0.97-1.10)         | 1.04 (0.97-1.11)        | 1.04 (0.98-1.11)         | 0.99 (0.92-1.06)   | 1.00 (0.93-1.07)         | 1.00 (0.94-1.08)        | 1.03 (0.96-1.10)         | 1.04 (0.98-1.12)   | <b>1.05 (1.00-1.11)</b>  | <b>1.06 (1.00-1.12)</b> |
| <b>Gases/fumes</b>     | 1.02 (0.96-1.09)         | 1.03 (0.96-1.10)        | 1.03 (0.97-1.09)         | 0.97 (0.91-1.04)   | 0.97 (0.91-1.04)         | 0.98 (0.91-1.04)        | 1.03 (0.98-1.10)         | 1.05 (0.99-1.12)   | <b>1.05 (1.00-1.10)</b>  | 1.05 (0.99-1.11)        |
| <b>VGDF</b>            | 1.02 (0.97-1.08)         | 1.03 (0.97-1.09)        | <b>1.05 (1.00-1.10)</b>  | 0.99 (0.93-1.04)   | 1.03 (0.97-1.08)         | 1.03 (0.97-1.08)        | 1.03 (0.98-1.08)         | 1.04 (0.99-1.09)   | 1.02 (0.98-1.07)         | 1.03 (0.98-1.08)        |
| <b>All pesticides</b>  | <b>1.12 (1.00-1.25)</b>  | <b>1.13 (1.01-1.26)</b> | <b>1.16 (1.10-1.30)</b>  | 1.07 (0.95-1.20)   | <b>1.12 (1.00-1.28)</b>  | <b>1.09 (1.00-1.22)</b> | <b>1.13 (1.00-1.30)</b>  | 1.03 (0.92-1.16)   | 0.94 (0.82-1.08)         | 0.97 (0.86-1.09)        |
| <b>Herbicides</b>      | <b>1.16 (1.00-1.32)</b>  | <b>1.16 (1.00-1.32)</b> | <b>1.22 (1.05-1.41)</b>  | 1.08 (0.93-1.25)   | 1.12 (0.97-1.30)         | 1.09 (0.96-1.24)        | 1.10 (0.93-1.31)         | 1.00 (0.86-1.16)   | 0.91 (0.77-1.09)         | 0.97 (0.83-1.12)        |
| <b>Insecticides</b>    | 1.10 (0.98-1.24)         | 1.12 (0.99-1.26)        | <b>1.15 (1.02-1.29)</b>  | 1.06 (0.93-1.20)   | 1.06 (0.92-1.22)         | 1.05 (0.92-1.18)        | 1.13 (0.99-1.30)         | 1.05 (0.93-1.19)   | 0.94 (0.83-1.09)         | 0.97 (0.85-1.10)        |

*Definitions of abbreviations:* GOLD, Global Obstructive Lung Disease; AO, Airflow Obstruction; RR, Relative Risk; CI, Confidence Interval; VGDF, Vapour, Gases, Dust and Fumes

† Adjusted for sex, smoking, pack-years, childhood and adulthood socioeconomic status, childhood and adulthood asthma and sampling weights. The analyses with biological dust, mineral dust, gases/fumes, and VGDF were additionally adjusted for all pesticides, whereas the analyses with all pesticides, herbicides, and insecticides were additionally adjusted for VGDF exposure.

The bolded text identifies results reaching statistical significance ( $p \leq 0.05$ )



**Table S6:** Correlations between the exposures as no, low, and high exposure (0/1/2) in the TAHS cohort

|                        | <b>Dusts</b>           |                     |                        |             | <b>Pesticides</b>     |                   |                     |
|------------------------|------------------------|---------------------|------------------------|-------------|-----------------------|-------------------|---------------------|
| <b>Correlation</b>     | <b>Biological Dust</b> | <b>Mineral Dust</b> | <b>Gases and Fumes</b> | <b>VGDF</b> | <b>All pesticides</b> | <b>Herbicides</b> | <b>Insecticides</b> |
| <b>Biological Dust</b> |                        | 0.47                | 0.56                   | 0.64        | 0.39                  | 0.35              | 0.34                |
| <b>Mineral Dust</b>    |                        |                     | 0.61                   | 0.59        | 0.40                  | 0.37              | 0.37                |
| <b>Gases and Fumes</b> |                        |                     |                        | 0.90        | 0.28                  | 0.25              | 0.24                |
| <b>VGDF</b>            |                        |                     |                        |             | 0.25                  | 0.22              | 0.22                |
| <b>All pesticides</b>  |                        |                     |                        |             |                       | 0.88              | 0.87                |
| <b>Herbicides</b>      |                        |                     |                        |             |                       |                   | 0.84                |

**Table S7:** Overview of number of workers with high exposure to all pesticides

| <b>ISCO-88 job description</b>                 | <b>ISCO-88</b> | <b>n (%)</b> |
|------------------------------------------------|----------------|--------------|
| <i>High exposure to all pesticides (n=151)</i> |                |              |
| Farm-hands and labourers                       | 9211           | 37 (24.5%)   |
| Gardeners, horticultural and nursery growers   | 6113           | 31 (20.5%)   |
| Market oriented crop and animal producer       | 6130           | 29 (19.2%)   |
| Forestry labourers                             | 9212           | 27 (17.8%)   |
| Mixed crop growers                             | 9322           | 27 (17.8%)   |

**Table S8:** Association between Ever (low and high) Exposure and Fixed Airflow Obstruction, Chronic Bronchitis and Respiratory Symptoms

| Exposure               | Fixed AO-GOLD |            |                         | Chronic bronchitis |            |                         | Chronic cough |            |                         | Chronic phlegm |            |                         | Dyspnoea    |            |                         |
|------------------------|---------------|------------|-------------------------|--------------------|------------|-------------------------|---------------|------------|-------------------------|----------------|------------|-------------------------|-------------|------------|-------------------------|
|                        | No<br>1,222   | Yes<br>113 | RR (95%CI) †            | No<br>1,075        | Yes<br>246 | RR (95%CI)              | No<br>1,131   | Yes<br>185 | RR (95%CI)              | No<br>1,146    | Yes<br>171 | RR (95%CI)              | No<br>1,107 | Yes<br>226 | RR (95%CI)              |
| <b>Biological dust</b> |               |            |                         |                    |            |                         |               |            |                         |                |            |                         |             |            |                         |
| No exposure            | 541           | 37         | Ref.                    | 484                | 87         | Ref.                    | 516           | 53         | Ref.                    | 507            | 60         | Ref.                    | 504         | 75         | Ref.                    |
| Low exposure           | 434           | 46         | <b>1.63 (1.01-2.65)</b> | 396                | 82         | 0.73 (0.46-1.14)        | 414           | 60         | 1.20 (0.78-1.84)        | 425            | 51         | 0.83 (0.53-1.29)        | 389         | 90         | 1.24 (0.86-1.78)        |
| High exposure          | 247           | 30         | 1.47 (0.81-2.69)        | 196                | 77         | 1.59 (0.96-2.64)        | 227           | 44         | 1.35 (0.79-2.31)        | 226            | 44         | 1.35 (0.80-2.27)        | 214         | 62         | <b>1.56 (1.00-2.48)</b> |
| <b>Mineral dust</b>    |               |            |                         |                    |            |                         |               |            |                         |                |            |                         |             |            |                         |
| No exposure            | 585           | 42         | Ref.                    | 522                | 98         | Ref.                    | 564           | 54         | Ref.                    | 565            | 54         | Ref.                    | 544         | 84         | Ref.                    |
| Low exposure           | 287           | 24         | 1.01 (0.57-1.79)        | 251                | 58         | 1.11 (0.67-1.83)        | 254           | 53         | <b>2.08 (1.32-3.29)</b> | 264            | 43         | 1.49 (0.92-2.41)        | 256         | 55         | 1.27 (0.84-1.93)        |
| High exposure          | 350           | 47         | 1.60 (0.94-2.72)        | 303                | 90         | 1.08 (0.66-1.77)        | 339           | 50         | 1.13 (0.67-1.90)        | 329            | 58         | 1.54 (0.93-2.55)        | 307         | 88         | <b>2.05 (1.33-3.15)</b> |
| <b>Gases/fumes</b>     |               |            |                         |                    |            |                         |               |            |                         |                |            |                         |             |            |                         |
| No exposure            | 352           | 22         | Ref.                    | 314                | 57         | Ref.                    | 336           | 32         | Ref.                    | 335            | 33         | Ref.                    | 327         | 48         | Ref.                    |
| Low exposure           | 515           | 46         | 1.47 (0.83-2.58)        | 454                | 101        | 0.88 (0.54-1.44)        | 479           | 76         | 1.42 (0.88-2.28)        | 485            | 69         | 1.22 (0.75-1.98)        | 465         | 95         | 1.21 (0.81-1.82)        |
| High exposure          | 355           | 45         | 1.53 (0.82-2.84)        | 308                | 88         | 0.97 (0.56-1.70)        | 342           | 49         | 0.95 (0.54-1.69)        | 338            | 53         | 1.16 (0.66-2.03)        | 315         | 84         | 1.55 (0.97-2.46)        |
| <b>VGDF</b>            |               |            |                         |                    |            |                         |               |            |                         |                |            |                         |             |            |                         |
| No exposure            | 300           | 21         | Ref.                    | 273                | 45         | Ref.                    | 294           | 22         | Ref.                    | 289            | 26         | Ref.                    | 281         | 41         | Ref.                    |
| Low exposure           | 411           | 32         | 1.20 (0.65-2.22)        | 363                | 76         | 0.88 (0.51-1.52)        | 379           | 58         | <b>1.90 (1.09-3.29)</b> | 387            | 42         | 1.34 (0.78-2.32)        | 371         | 72         | 1.05 (0.67-1.63)        |
| High exposure          | 511           | 60         | 1.31 (0.71-2.41)        | 440                | 125        | 1.03 (0.60-1.78)        | 484           | 77         | 1.48 (0.83-2.65)        | 482            | 77         | 1.29 (0.73-2.26)        | 455         | 114        | <b>1.72 (1.08-2.75)</b> |
| <b>All pesticides</b>  |               |            |                         |                    |            |                         |               |            |                         |                |            |                         |             |            |                         |
| No exposure            | 1,024         | 85         | Ref.                    | 916                | 183        | Ref.                    | 977           | 116        | Ref.                    | 977            | 116        | Ref.                    | 940         | 169        | Ref.                    |
| Low exposure           | 68            | 7          | 0.92 (0.35-2.44)        | 58                 | 17         | 1.61 (0.72-3.57)        | 62            | 13         | 1.95 (0.92-4.16)        | 59             | 15         | <b>2.41 (1.11-5.17)</b> | 55          | 20         | <b>2.41 (1.27-4.56)</b> |
| High exposure          | 130           | 21         | <b>1.78 (1.01-3.27)</b> | 102                | 46         | <b>1.82 (1.08-3.07)</b> | 118           | 28         | 1.68 (0.92-3.09)        | 122            | 24         | <b>1.81 (1.04-3.15)</b> | 112         | 38         | <b>1.75 (1.03-2.95)</b> |
| <b>Herbicides</b>      |               |            |                         |                    |            |                         |               |            |                         |                |            |                         |             |            |                         |
| No exposure            | 1,061         | 87         | Ref.                    | 947                | 191        | Ref.                    | 1,011         | 121        | Ref.                    | 1,008          | 124        | Ref.                    | 966         | 182        | Ref.                    |
| Low exposure           | 66            | 11         | 2.02 (0.95-4.28)        | 57                 | 20         | 1.62 (0.76-3.44)        | 59            | 17         | <b>2.37 (1.19-4.71)</b> | 63             | 13         | 1.58 (0.74-3.34)        | 60          | 17         | 1.65 (0.86-3.10)        |
| High exposure          | 95            | 15         | <b>2.15 (1.05-4.42)</b> | 72                 | 35         | <b>1.95 (1.03-3.72)</b> | 87            | 19         | 1.35 (0.66-2.78)        | 87             | 18         | 1.68 (0.83-3.39)        | 81          | 28         | 1.29 (0.70-2.36)        |
| <b>Insecticides</b>    |               |            |                         |                    |            |                         |               |            |                         |                |            |                         |             |            |                         |
| No exposure            | 1,060         | 91         | Ref.                    | 947                | 194        | Ref.                    | 1,012         | 123        | Ref.                    | 1,009          | 125        | Ref.                    | 970         | 181        | Ref.                    |
| Low exposure           | 34            | 2          | 0.65 (0.14-2.90)        | 28                 | 8          | 1.07 (0.38-3.02)        | 28            | 8          | 2.48 (0.97-6.33)        | 30             | 6          | 1.77 (0.64-4.92)        | 26          | 10         | 1.91 (0.82-4.41)        |
| High exposure          | 128           | 20         | <b>2.02 (1.07-3.79)</b> | 101                | 44         | <b>1.83 (1.04-3.19)</b> | 117           | 26         | 1.59 (0.87-2.90)        | 119            | 24         | 1.60 (0.87-2.90)        | 111         | 36         | 1.50 (0.88-2.54)        |

- Adjusted for sex, smoking, pack-years, adult and childhood socio economic status, adult and child asthma and sampling weight. Additionally, all pesticides was adjusted for the analysis with biological dust, mineral dust, gases/fumes, VGDF while VGDF was adjusted for all pesticides, herbicides and insecticides

## REFERENCES

1. Matheson MC, Benke G, Raven J, *et al.* Biological dust exposure in the workplace is a risk factor for chronic obstructive pulmonary disease. *Thorax* 2005; 60: 645–651.
2. Australian Bureau of Statistics. Socio-Economic Indexes for Areas (SEIFA) Technical Paper. Canberra.:Commonwealth of Australia; 2011. ABS Catalogue no. 2033.0.55.001; 2011.
